# Supplementary material
Source: PubMed Central journal article supplement (PMC7900926)
Supplement: f-77-00054-sup1.pdf [file f-77-00054-sup1.pdf]

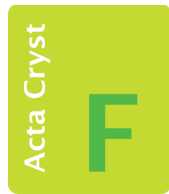

STRUCTURAL BIOLOGY  
COMMUNICATIONS

**Volume 77 (2021)**

**Supporting information for article:**

**Crystal structure of acetoacetyl-CoA reductase from *Rickettsia felis***

**Justas V. Rodarte, Jan Abendroth, Thomas E. Edwards, Donald D. Lorimer,  
Bart L. Staker, Sunny Zhang, Peter J. Myler and Krystle J. McLaughlin**

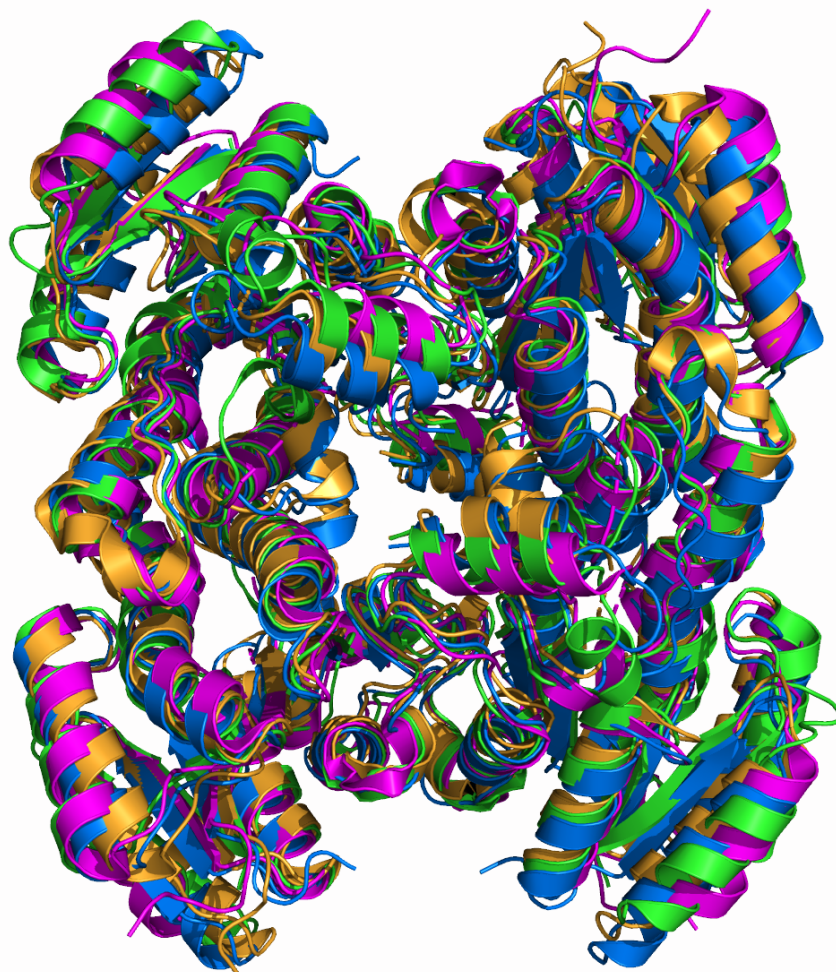

*R. felis*  
*B. pseudomallei*  
*B. anthracis*  
*S. aureus*

**Supplementary Figure S1.** Structural Alignment of acetoacetyl-CoA reductases from *Rickettsia felis* (PDB entry 4kms) and *Burkholderia pseudomallei* (PDB entry 3ezl), and FabGs from *Staphylococcus aureus* (PDB entry 3osu) and *Bacillus anthracis* (PDB entry 2uvd). Tetramers were generated using crystallographic symmetry and aligned in PyMOL.
